# Supplementary material for: Host-Environment Interplay Shapes Fungal Diversity in Mosquitoes
Source: PubMed Central journal article supplement (PMC8550294; doi:10.1128/msphere.00646-21), 2021-09-29

A

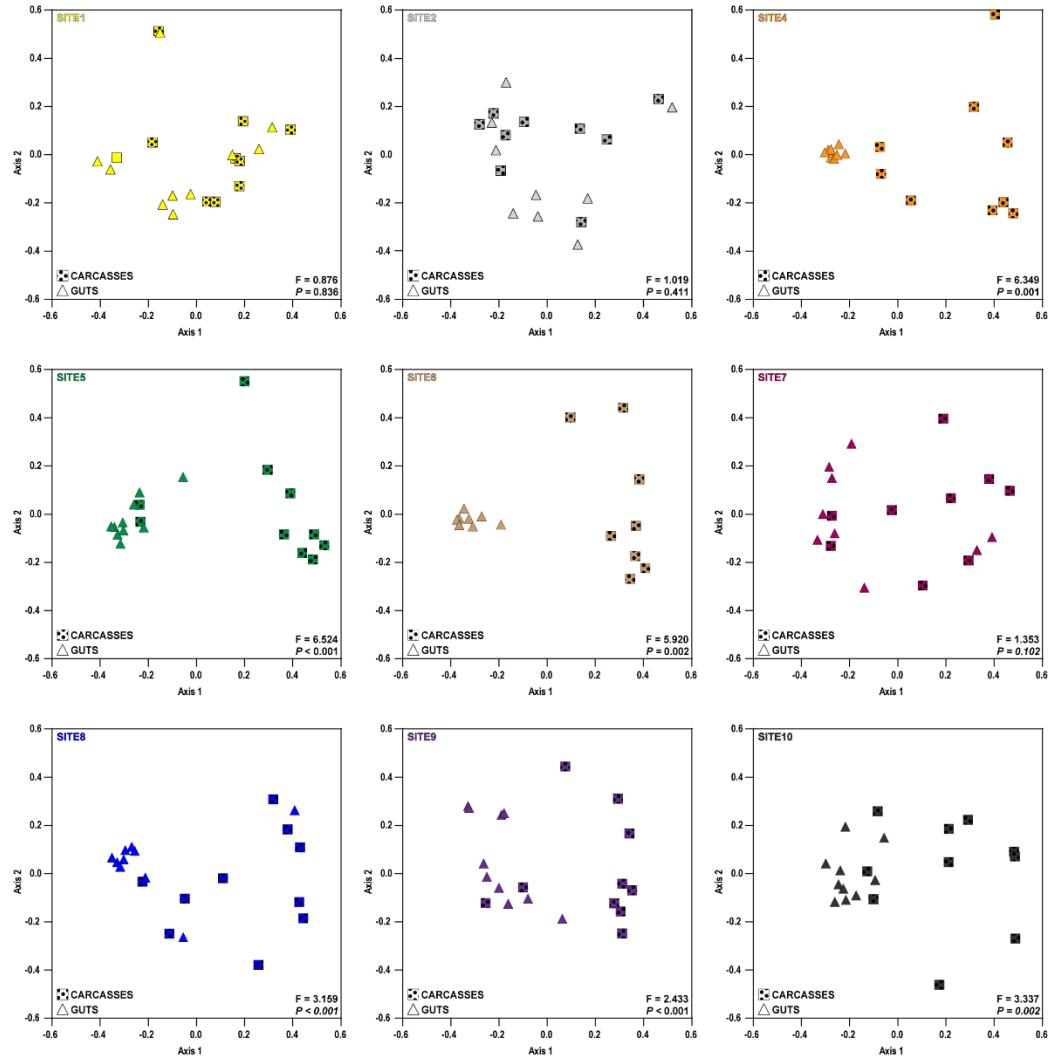

B

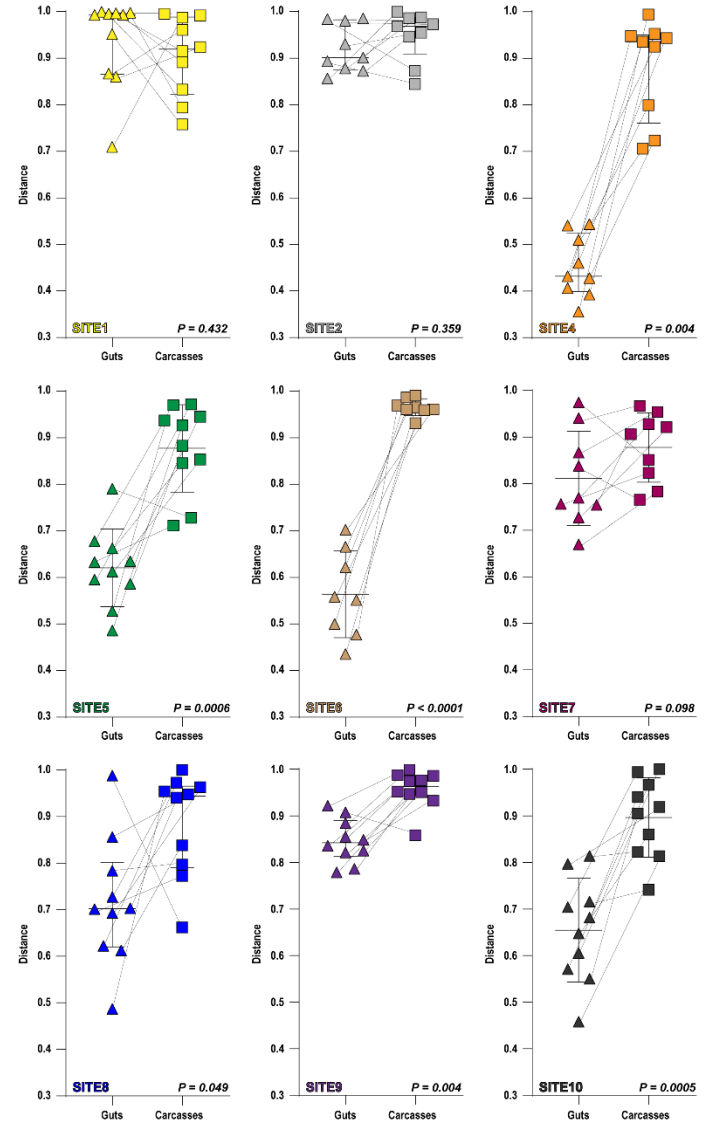

Supplement: msphere.00646-21-sf002.pdf [file msphere.00646-21-sf002.pdf]
