# Supplementary material for: Host-Environment Interplay Shapes Fungal Diversity in Mosquitoes
Source: PubMed Central journal article supplement (PMC8550294; doi:10.1128/msphere.00646-21), 2021-09-29
Supplement: msphere.00646-21-st001.pdf [file msphere.00646-21-st001.pdf]

**Table S1. Alpha diversity indices of the larval breeding water and mosquito guts and carcass across the larval breeding sites.**

| Larval breeding site | Collection date | Lat, Long                             | Type of larval breeding site | Mosquito larvae | Sample type | Total # of sequences                  | Observed OTU richness (Sobs) | Estimated OTU richness (Chao1) | Shannon's diversity (H) |
|----------------------|-----------------|---------------------------------------|------------------------------|-----------------|-------------|---------------------------------------|------------------------------|--------------------------------|-------------------------|
| 1                    | 09/19/2017      | N<br>39°10'53.0",<br>W<br>96°35'35.5" | Natural breeding site        |                 | Water       | 49,086                                | 299                          | 337                            | 3.67                    |
|                      |                 |                                       |                              | 1               | Gut         | 16,650                                | 11.0                         | 11.5                           | 1.84                    |
|                      |                 |                                       |                              |                 | Carcass     | 1,710                                 | 4.00                         | 4.00                           | 0.692                   |
|                      |                 |                                       |                              | 2               | Gut         | 7,354                                 | 16.0                         | 17.0                           | 1.94                    |
|                      |                 |                                       |                              |                 | Carcass     | 18,885                                | 48.0                         | 52.2                           | 2.40                    |
|                      |                 |                                       |                              | 3               | Gut         | 18,148                                | 25.0                         | 32.0                           | 2.25                    |
|                      |                 |                                       |                              |                 | Carcass     | 29,932                                | 41.0                         | 50.0                           | 1.88                    |
|                      |                 |                                       |                              | 4               | Gut         | 6,873                                 | 20.0                         | 20.5                           | 2.14                    |
|                      |                 |                                       |                              |                 | Carcass     | 27,899                                | 30.0                         | 37.0                           | 1.99                    |
|                      |                 |                                       |                              | 5               | Gut         | 9,816                                 | 53.0                         | 62.4                           | 2.70                    |
|                      |                 |                                       |                              |                 | Carcass     | 5,121                                 | 21.0                         | 22.5                           | 2.04                    |
|                      |                 |                                       |                              | 6               | Gut         | 6,355                                 | 7.00                         | 7.00                           | 1.41                    |
|                      |                 |                                       |                              |                 | Carcass     | 27,755                                | 26.0                         | 28.0                           | 2.46                    |
|                      |                 |                                       |                              | 7               | Gut         | 22,732                                | 46.0                         | 46.2                           | 2.32                    |
|                      |                 |                                       |                              |                 | Carcass     | 45,709                                | 36.0                         | 58.5                           | 0.686                   |
|                      |                 |                                       |                              | 8               | Gut         | 126,191                               | 23.0                         | 23.5                           | 0.462                   |
|                      |                 |                                       |                              |                 | Carcass     | 28,054                                | 35.0                         | 37.5                           | 2.31                    |
|                      |                 |                                       |                              | 9               | Gut         | 24,002                                | 40.0                         | 47.5                           | 2.65                    |
|                      |                 |                                       |                              |                 | Carcass     | 7,006                                 | 41.0                         | 50.3                           | 2.81                    |
|                      |                 |                                       |                              | 10              | Gut         | 30,147                                | 29.0                         | 29.5                           | 2.22                    |
| Carcass              | 17,014          | 30.0                                  | 40.5                         |                 | 2.22        |                                       |                              |                                |                         |
| 2                    | 09/25/2017      | N<br>39°10'56.1",<br>W<br>96°34'49.1" | Natural breeding site        |                 | Water       | 118,604                               | 421                          | 435                            | 3.97                    |
|                      |                 |                                       |                              | 1               | Gut         | 10,788                                | 38.0                         | 39.5                           | 1.72                    |
|                      |                 |                                       |                              |                 | Carcass     | 3,939                                 | 11.0                         | 11.0                           | 1.60                    |
|                      |                 |                                       |                              | 2               | Gut         | 57,441                                | 43.0                         | 48.0                           | 2.39                    |
|                      |                 |                                       |                              |                 | Carcass     | 2,356                                 | 14.0                         | 14.0                           | 1.79                    |
|                      |                 |                                       |                              | 3               | Gut         | 14,084                                | 29.0                         | 32.0                           | 1.98                    |
|                      |                 |                                       |                              |                 | Carcass     | 16,407                                | 40.0                         | 43.8                           | 2.69                    |
|                      |                 |                                       |                              | 4               | Gut         | 3,504                                 | 9.0                          | 9.0                            | 1.44                    |
|                      |                 |                                       |                              |                 | Carcass     | 21,326                                | 19.0                         | 21.0                           | 1.53                    |
|                      |                 |                                       |                              | 5               | Gut         | 30,093                                | 34.0                         | 62.0                           | 2.43                    |
|                      |                 |                                       |                              |                 | Carcass     | 19,899                                | 56.0                         | 67.0                           | 2.11                    |
|                      |                 |                                       |                              | 6               | Gut         | 10,400                                | 27.0                         | 30.0                           | 2.31                    |
|                      |                 |                                       |                              |                 | Carcass     | 6,236                                 | 38.0                         | 38.8                           | 3.08                    |
|                      |                 |                                       |                              | 7               | Gut         | 42,482                                | 47.0                         | 56.3                           | 2.37                    |
|                      |                 |                                       |                              |                 | Carcass     | 54,147                                | 51.0                         | 56.6                           | 1.65                    |
|                      |                 |                                       |                              | 8               | Gut         | 42,142                                | 56.0                         | 65.3                           | 2.59                    |
|                      |                 |                                       |                              |                 | Carcass     | 11,381                                | 30.0                         | 31.5                           | 2.46                    |
|                      |                 |                                       |                              | 9               | Gut         | 21,147                                | 60.0                         | 67.5                           | 2.86                    |
|                      |                 |                                       |                              |                 | Carcass     | 25,981                                | 35.0                         | 36.5                           | 2.97                    |
|                      |                 |                                       |                              | 4               | 08/13/2018  | N<br>39°12'01.6",<br>W<br>96°33'20.1" | Oviposition cup              |                                | Water                   |
| 1                    | Gut             | 36,544                                | 94.0                         |                 |             |                                       |                              | 99.0                           | 2.16                    |
|                      | Carcass         | 10,684                                | 14.0                         |                 |             |                                       |                              | 14.0                           | 1.14                    |
|                      | Gut             | 23,885                                | 66.0                         |                 |             |                                       |                              | 79.2                           | 2.15                    |
| 2                    | Carcass         | 11,536                                | 32.0                         |                 |             |                                       |                              | 35.0                           | 2.27                    |
|                      | Gut             | 35,845                                | 82.0                         |                 |             |                                       |                              | 90.7                           | 2.21                    |
| 3                    | Carcass         | 3,676                                 | 25.0                         |                 |             |                                       |                              | 30.0                           | 2.52                    |
|                      | Gut             | 42,294                                | 84.0                         |                 |             |                                       |                              | 95.2                           | 2.32                    |
|                      | Carcass         | 4,763                                 | 27.0                         |                 |             |                                       |                              | 34.0                           | 2.47                    |

|         |            |                                       |                 |       |            |                                       |                 |       |         |        |      |      |      |
|---------|------------|---------------------------------------|-----------------|-------|------------|---------------------------------------|-----------------|-------|---------|--------|------|------|------|
|         |            |                                       |                 | 5     | Gut        | 22,950                                | 75.0            | 113   | 2.21    |        |      |      |      |
|         |            |                                       |                 |       | Carcass    | 16,084                                | 47.0            | 56.3  | 2.51    |        |      |      |      |
|         |            |                                       |                 | 6     | Gut        | 36,705                                | 48.0            | 49.2  | 1.69    |        |      |      |      |
|         |            |                                       |                 |       | Carcass    | 3,584                                 | 20.0            | 21.0  | 2.26    |        |      |      |      |
|         |            |                                       |                 | 7     | Gut        | 27,240                                | 77.0            | 101   | 2.15    |        |      |      |      |
|         |            |                                       |                 |       | Carcass    | 4,935                                 | 33.0            | 34.5  | 2.61    |        |      |      |      |
|         |            |                                       |                 | 8     | Gut        | 31,945                                | 86.0            | 97.1  | 2.35    |        |      |      |      |
|         |            |                                       |                 |       | Carcass    | 4,079                                 | 19.0            | 20.0  | 2.35    |        |      |      |      |
|         |            |                                       |                 | 9     | Gut        | 28,968                                | 64.0            | 91.5  | 2.15    |        |      |      |      |
|         |            |                                       |                 |       | Carcass    | 7,503                                 | 40.0            | 47.5  | 3.01    |        |      |      |      |
| 5       | 09/12/2018 | N<br>39°11'35.5",<br>W<br>96°34'15.7" | Oviposition cup | Water | 43,501     | 315                                   | 368             | 2.34  |         |        |      |      |      |
|         |            |                                       |                 | 1     | Gut        | 41,773                                | 143             | 185   | 3.09    |        |      |      |      |
|         |            |                                       |                 |       | Carcass    | 4,534                                 | 19.0            | 19.0  | 2.16    |        |      |      |      |
|         |            |                                       |                 | 2     | Gut        | 33,268                                | 184             | 217   | 3.38    |        |      |      |      |
|         |            |                                       |                 |       | Carcass    | 3,087                                 | 20.0            | 30.0  | 2.05    |        |      |      |      |
|         |            |                                       |                 | 3     | Gut        | 29,338                                | 142             | 148   | 3.18    |        |      |      |      |
|         |            |                                       |                 |       | Carcass    | 8,514                                 | 53.0            | 66.8  | 2.87    |        |      |      |      |
|         |            |                                       |                 | 4     | Gut        | 22,566                                | 132             | 140   | 2.97    |        |      |      |      |
|         |            |                                       |                 |       | Carcass    | 4,725                                 | 29.0            | 30.0  | 2.76    |        |      |      |      |
|         |            |                                       |                 | 5     | Gut        | 35,017                                | 157             | 184   | 3.38    |        |      |      |      |
|         |            |                                       |                 |       | Carcass    | 8,993                                 | 37.0            | 39.5  | 2.34    |        |      |      |      |
|         |            |                                       |                 | 6     | Gut        | 23,661                                | 148             | 164   | 3.32    |        |      |      |      |
|         |            |                                       |                 |       | Carcass    | 24,930                                | 41.0            | 46.0  | 0.920   |        |      |      |      |
|         |            |                                       |                 | 7     | Gut        | 12,330                                | 49.0            | 50.5  | 3.11    |        |      |      |      |
|         |            |                                       |                 |       | Carcass    | 24,794                                | 61.0            | 64.5  | 2.57    |        |      |      |      |
|         |            |                                       |                 | 8     | Gut        | 26,461                                | 169             | 188   | 2.99    |        |      |      |      |
|         |            |                                       |                 |       | Carcass    | 3,912                                 | 25.0            | 28.0  | 2.70    |        |      |      |      |
|         |            |                                       |                 | 9     | Gut        | 34,380                                | 124             | 139   | 3.02    |        |      |      |      |
|         |            |                                       |                 |       | Carcass    | 18,429                                | 54.0            | 69.0  | 2.83    |        |      |      |      |
|         |            |                                       |                 | 10    | Gut        | 40,792                                | 165             | 170   | 3.03    |        |      |      |      |
| Carcass | 4,500      | 27.0                                  | 34.5            |       | 2.28       |                                       |                 |       |         |        |      |      |      |
| 6       | 09/12/2018 | N<br>39°10'56.2",<br>W<br>96°34'48.7" | Oviposition cup | Water | 23,222     | 379                                   | 427             | 3.47  |         |        |      |      |      |
|         |            |                                       |                 | 1     | Gut        | 31,398                                | 105             | 118   | 3.12    |        |      |      |      |
|         |            |                                       |                 |       | Carcass    | 3,689                                 | 26.0            | 26.3  | 2.32    |        |      |      |      |
|         |            |                                       |                 | 2     | Gut        | 18,279                                | 72.0            | 75.0  | 2.89    |        |      |      |      |
|         |            |                                       |                 |       | Carcass    | 3,147                                 | 22.0            | 28.0  | 2.34    |        |      |      |      |
|         |            |                                       |                 | 3     | Gut        | 29,311                                | 120             | 165   | 3.19    |        |      |      |      |
|         |            |                                       |                 |       | Carcass    | 1,842                                 | 17.0            | 17.0  | 2.45    |        |      |      |      |
|         |            |                                       |                 | 4     | Gut        | 34,573                                | 105             | 112   | 2.96    |        |      |      |      |
|         |            |                                       |                 |       | Carcass    | 4,183                                 | 17.0            | 17.0  | 2.07    |        |      |      |      |
|         |            |                                       |                 | 5     | Gut        | 18,643                                | 78.0            | 104   | 2.89    |        |      |      |      |
|         |            |                                       |                 |       | Carcass    | 2,291                                 | 18.0            | 24.0  | 2.22    |        |      |      |      |
|         |            |                                       |                 | 6     | Gut        | 32,571                                | 75.0            | 93.0  | 2.80    |        |      |      |      |
|         |            |                                       |                 |       | Carcass    | 2,062                                 | 22.0            | 22.0  | 2.68    |        |      |      |      |
|         |            |                                       |                 | 7     | Gut        | 32,542                                | 99.0            | 132   | 3.10    |        |      |      |      |
|         |            |                                       |                 |       | Carcass    | 20,354                                | 28.0            | 34.0  | 1.18    |        |      |      |      |
|         |            |                                       |                 | 8     | Gut        | 33,480                                | 105             | 114   | 3.24    |        |      |      |      |
|         |            |                                       |                 |       | Carcass    | 5,829                                 | 35.0            | 35.0  | 3.05    |        |      |      |      |
|         |            |                                       |                 | 7     | 09/14/2018 | N<br>39°11'45.1",<br>W<br>96°35'23.1" | Oviposition cup | Water | 29,567  | 535    | 652  | 3.90 |      |
|         |            |                                       |                 |       |            |                                       |                 | 1     | Gut     | 86,886 | 97.0 | 124  | 2.77 |
|         |            |                                       |                 |       |            |                                       |                 |       | Carcass | 3,893  | 26.0 | 27.5 | 2.52 |
| 2       | Gut        | 5,549                                 | 23.0            |       |            |                                       |                 | 24.5  | 2.21    |        |      |      |      |
|         | Carcass    | 2,281                                 | 11.0            |       |            |                                       |                 | 11.0  | 1.93    |        |      |      |      |
| 3       | Gut        | 16,184                                | 45.0            |       |            |                                       |                 | 45.6  | 2.41    |        |      |      |      |
|         | Carcass    | 27,136                                | 62.0            |       |            |                                       |                 | 83.0  | 2.64    |        |      |      |      |
| 4       | Gut        | 17,879                                | 75.0            |       |            |                                       |                 | 90.0  | 2.88    |        |      |      |      |
|         | Carcass    | 16,020                                | 42.0            |       |            |                                       |                 | 47.0  | 2.12    |        |      |      |      |
| 5       | Gut        | 26,510                                | 90.0            |       |            |                                       |                 | 101   | 2.29    |        |      |      |      |
|         | Carcass    | 24,512                                | 76.0            |       |            |                                       |                 | 76.8  | 3.34    |        |      |      |      |
| 6       | Gut        | 8,317                                 | 88.0            |       |            |                                       |                 | 96.3  | 2.98    |        |      |      |      |

|  |  |  |  |    |         |        |      |      |      |
|--|--|--|--|----|---------|--------|------|------|------|
|  |  |  |  |    | Carcass | 1,589  | 17.0 | 17.0 | 2.10 |
|  |  |  |  | 7  | Gut     | 16,520 | 105  | 120  | 3.09 |
|  |  |  |  |    | Carcass | 4,575  | 26.0 | 29.0 | 2.68 |
|  |  |  |  | 8  | Gut     | 4,863  | 23.0 | 23.5 | 2.31 |
|  |  |  |  |    | Carcass | 23,646 | 30.0 | 31.5 | 1.76 |
|  |  |  |  | 9  | Gut     | 23,872 | 107  | 113  | 2.49 |
|  |  |  |  |    | Carcass | 5,573  | 26.0 | 28.0 | 2.34 |
|  |  |  |  |    | Water   | 38,335 | 294  | 365  | 3.23 |
|  |  |  |  | 1  | Gut     | 28,287 | 121  | 151  | 2.71 |
|  |  |  |  |    | Carcass | 6,118  | 32.0 | 37.0 | 2.50 |
|  |  |  |  | 2  | Gut     | 35,063 | 102  | 117  | 2.49 |
|  |  |  |  |    | Carcass | 5,236  | 20.0 | 20.0 | 2.32 |
|  |  |  |  | 3  | Gut     | 40,767 | 83.0 | 96.2 | 2.69 |
|  |  |  |  |    | Carcass | 3,331  | 20.0 | 20.3 | 2.31 |
|  |  |  |  | 4  | Gut     | 37,806 | 102  | 110  | 2.40 |
|  |  |  |  |    | Carcass | 13,276 | 36.0 | 39.3 | 2.46 |
|  |  |  |  | 5  | Gut     | 11,306 | 46.0 | 61.0 | 2.51 |
|  |  |  |  |    | Carcass | 18,248 | 30.0 | 33.0 | 2.11 |
|  |  |  |  | 6  | Gut     | 33,546 | 85.0 | 91.4 | 2.40 |
|  |  |  |  |    | Carcass | 5,232  | 32.0 | 42.5 | 2.64 |
|  |  |  |  | 7  | Gut     | 8,403  | 22.0 | 22.0 | 1.89 |
|  |  |  |  |    | Carcass | 28,747 | 85.0 | 103  | 2.75 |
|  |  |  |  | 8  | Gut     | 29,840 | 90.0 | 123  | 2.61 |
|  |  |  |  |    | Carcass | 9,825  | 54.0 | 61.0 | 2.65 |
|  |  |  |  | 9  | Gut     | 39,794 | 97.0 | 107  | 2.73 |
|  |  |  |  |    | Carcass | 7,732  | 38.0 | 41.0 | 2.88 |
|  |  |  |  | 10 | Gut     | 35,418 | 108  | 138  | 2.70 |
|  |  |  |  |    | Carcass | 5,780  | 19.0 | 29.0 | 1.36 |
|  |  |  |  |    | Water   | 16,275 | 289  | 331  | 4.39 |
|  |  |  |  | 1  | Gut     | 45,827 | 176  | 198  | 3.40 |
|  |  |  |  |    | Carcass | 8,999  | 35.0 | 36.5 | 2.85 |
|  |  |  |  | 2  | Gut     | 14,724 | 93.0 | 98.0 | 3.69 |
|  |  |  |  |    | Carcass | 10,096 | 36.0 | 37.5 | 2.59 |
|  |  |  |  | 3  | Gut     | 52,929 | 73.0 | 79.0 | 1.88 |
|  |  |  |  |    | Carcass | 6,287  | 25.0 | 25.0 | 2.50 |
|  |  |  |  | 4  | Gut     | 34,127 | 85.0 | 95.5 | 3.44 |
|  |  |  |  |    | Carcass | 17,050 | 29.0 | 35.0 | 1.90 |
|  |  |  |  | 5  | Gut     | 29,796 | 110  | 136  | 3.25 |
|  |  |  |  |    | Carcass | 7,641  | 27.0 | 27.5 | 1.90 |
|  |  |  |  | 6  | Gut     | 27,437 | 86.0 | 96.0 | 2.91 |
|  |  |  |  |    | Carcass | 4,635  | 20.0 | 20.5 | 2.24 |
|  |  |  |  | 7  | Gut     | 42,186 | 80.0 | 81.0 | 2.96 |
|  |  |  |  |    | Carcass | 21,009 | 75.0 | 77.5 | 3.24 |
|  |  |  |  | 8  | Gut     | 19,433 | 107  | 113  | 3.20 |
|  |  |  |  |    | Carcass | 22,289 | 42.0 | 42.5 | 2.24 |
|  |  |  |  | 9  | Gut     | 25,959 | 97.0 | 101  | 3.27 |
|  |  |  |  |    | Carcass | 2,830  | 18.0 | 18.0 | 2.23 |
|  |  |  |  | 10 | Gut     | 17,285 | 57.0 | 60.0 | 3.10 |
|  |  |  |  |    | Carcass | 2,896  | 39.0 | 46.5 | 3.20 |
|  |  |  |  |    | Water   | 37,901 | 453  | 598  | 2.88 |
|  |  |  |  | 1  | Gut     | 27,520 | 152  | 179  | 3.52 |
|  |  |  |  |    | Carcass | 8,138  | 58.0 | 58.8 | 3.43 |
|  |  |  |  | 2  | Gut     | 22,195 | 116  | 118  | 3.22 |
|  |  |  |  |    | Carcass | 15,770 | 72.0 | 72.2 | 3.25 |
|  |  |  |  | 3  | Gut     | 22,426 | 127  | 138  | 3.16 |
|  |  |  |  |    | Carcass | 2,896  | 22.0 | 23.5 | 2.57 |
|  |  |  |  | 4  | Gut     | 31,497 | 98.0 | 116  | 3.06 |
|  |  |  |  |    | Carcass | 14,175 | 43.0 | 48.0 | 2.63 |
|  |  |  |  | 5  | Gut     | 25,278 | 72.0 | 105  | 2.76 |
|  |  |  |  |    | Carcass | 19,604 | 73.0 | 79.0 | 3.30 |

|  |  |  |  |    |         |        |      |      |      |
|--|--|--|--|----|---------|--------|------|------|------|
|  |  |  |  | 6  | Gut     | 31,289 | 133  | 138  | 3.33 |
|  |  |  |  |    | Carcass | 10,938 | 60.0 | 67.2 | 3.11 |
|  |  |  |  | 7  | Gut     | 34,234 | 142  | 159  | 3.42 |
|  |  |  |  |    | Carcass | 21,803 | 42.0 | 43.5 | 2.53 |
|  |  |  |  | 8  | Gut     | 31,769 | 125  | 146  | 3.38 |
|  |  |  |  |    | Carcass | 8,444  | 25.0 | 25.0 | 2.59 |
|  |  |  |  | 9  | Gut     | 26,216 | 76.0 | 98.5 | 3.43 |
|  |  |  |  |    | Carcass | 8,120  | 25.0 | 25.5 | 2.49 |
|  |  |  |  | 10 | Gut     | 40,390 | 171  | 182  | 3.39 |
|  |  |  |  |    | Carcass | 18,781 | 44.0 | 49.0 | 2.90 |
