# Supplementary material for: Host-Environment Interplay Shapes Fungal Diversity in Mosquitoes
Source: PubMed Central journal article supplement (PMC8550294; doi:10.1128/msphere.00646-21), 2021-09-29
Supplement: msphere.00646-21-st002.pdf [file msphere.00646-21-st002.pdf]

**Table S2. Indicator value index (IndVal) calculations of 41 mosquito gut Indicator species across larval breeding sites.**

| OTUID    | Taxa assignment                  | Ecological guild                                                 | IndVal | A <sub>ind</sub> | B <sub>pa</sub> |
|----------|----------------------------------|------------------------------------------------------------------|--------|------------------|-----------------|
| Otu00097 | <i>Penicillium citrinum</i>      | Saprophyte                                                       | 0.539  | 0.85             | 0.341           |
| Otu00040 | Unclassified Trichosphaeriales   | -                                                                | 0.468  | 0.98             | 0.224           |
| Otu00079 | <i>Ganoderma</i> sp.             | Saprophyte, Plant pathogen                                       | 0.455  | 0.88             | 0.235           |
| Otu00035 | Unclassified Agaricomycetes      | -                                                                | 0.425  | 0.639            | 0.282           |
| Otu00056 | <i>Deniquelata barringtoniae</i> | Saprophyte                                                       | 0.42   | 0.882            | 0.2             |
| Otu00136 | Unclassified Sclerostagonospora  | Saprophyte                                                       | 0.419  | 0.785            | 0.224           |
| Otu00210 | <i>Penicillium sumatrense</i>    | Saprophyte                                                       | 0.416  | 0.866            | 0.2             |
| Otu00022 | Unclassified Ustilaginaceae      | Plant pathogen                                                   | 0.408  | 0.944            | 0.176           |
| Otu00178 | Unclassified Ascomycota          | -                                                                | 0.408  | 0.709            | 0.235           |
| Otu00395 | Unclassified Ustilaginales       | -                                                                | 0.406  | 1                | 0.165           |
| Otu00093 | <i>Coprinellus disseminatus</i>  | Saprophyte                                                       | 0.399  | 0.969            | 0.165           |
| Otu00129 | <i>Gibberella zeae</i>           | Plant pathogen                                                   | 0.393  | 0.939            | 0.165           |
| Otu00046 | Unclassified Agaricomycetes      | -                                                                | 0.391  | 1                | 0.153           |
| Otu00095 | Unclassified Fungus              | -                                                                | 0.389  | 0.86             | 0.176           |
| Otu00036 | <i>Lasiodiopodia crassispora</i> | Plant pathogen                                                   | 0.385  | 0.741            | 0.2             |
| Otu00034 | Unclassified Chaetomiaceae       | Saprophyte, Plant pathogen, Endophyte, Animal pathogen, Epiphyte | 0.375  | 0.702            | 0.2             |
| Otu00096 | Unclassified Sporormiaceae       | Saprophyte                                                       | 0.362  | 0.855            | 0.153           |
| Otu00270 | <i>Curreya</i> sp.               | Saprophyte                                                       | 0.352  | 0.702            | 0.176           |
| Otu00111 | <i>Stachybotrys microspora</i>   | Saprophyte                                                       | 0.348  | 0.857            | 0.141           |
| Otu00230 | <i>Calvatia cyathiformis</i>     | Saprophyte                                                       | 0.343  | 1                | 0.118           |
| Otu00201 | Unclassified Ascomycota          | -                                                                | 0.34   | 0.981            | 0.118           |
| Otu00326 | <i>Aspergillus flavus</i>        | Saprophyte, Plant pathogen, Endophyte, Animal pathogen           | 0.334  | 0.789            | 0.141           |
| Otu00166 | <i>Coprinopsis calospora</i>     | Saprophyte                                                       | 0.328  | 0.831            | 0.129           |
| Otu00051 | Unclassified Fungus              | -                                                                | 0.325  | 0.995            | 0.106           |
| Otu00131 | Unclassified Microascaceae       | Saprophyte, Plant pathogen, Animal pathogen, Endophyte           | 0.325  | 0.898            | 0.118           |
| Otu00346 | <i>Scleroderma</i> sp.           | Ectomycorrhizal                                                  | 0.325  | 1                | 0.106           |
| Otu00380 | <i>Trichoderma asperellum</i>    | Saprophyte, Plant pathogen, Endophyte                            | 0.325  | 1                | 0.106           |
| Otu00258 | Unclassified Fungus              | -                                                                | 0.324  | 0.894            | 0.118           |
| Otu00075 | <i>Chlorophyllum molybdites</i>  | Saprophyte                                                       | 0.318  | 0.78             | 0.129           |
| Otu00188 | <i>Aplosporella javeedii</i>     | Plant pathogen                                                   | 0.313  | 0.834            | 0.118           |
| Otu00187 | Unclassified Fungus              | -                                                                | 0.307  | 1                | 0.094           |
| Otu00250 | Unclassified Trichosphaeriales   | -                                                                | 0.307  | 1                | 0.094           |
| Otu00106 | <i>Phaeoacremonium tuscanum</i>  | Plant pathogen                                                   | 0.304  | 0.872            | 0.106           |
| Otu00105 | <i>Paraconiothyrium</i> sp       | Plant pathogen                                                   | 0.297  | 0.836            | 0.106           |
| Otu00161 | <i>Phaeobotryon cupressi</i>     | Plant pathogen                                                   | 0.287  | 1                | 0.082           |
| Otu00228 | <i>Pilidiella eucalyptorum</i>   | Plant pathogen                                                   | 0.287  | 1                | 0.082           |
| Otu00328 | <i>Inonotus hispidus</i>         | Saprophyte                                                       | 0.287  | 1                | 0.082           |
| Otu00118 | <i>Wallemia sebi</i>             | Saprophyte                                                       | 0.266  | 0.999            | 0.071           |
| Otu00146 | <i>Periconia</i> sp.             | Saprophyte, Plant pathogen, Endophyte                            | 0.266  | 1                | 0.071           |
| Otu00269 | Unclassified Fungus              | -                                                                | 0.266  | 1                | 0.071           |
| Otu00396 | Unclassified Fungus              | -                                                                | 0.266  | 1                | 0.071           |
