# Supplementary material for: Host-Environment Interplay Shapes Fungal Diversity in Mosquitoes
Source: PubMed Central journal article supplement (PMC8550294; doi:10.1128/msphere.00646-21), 2021-09-29
Supplement: msphere.00646-21-st003.pdf [file msphere.00646-21-st003.pdf]

**Table S3. Point-biserial correlation ( $r_{pb}$ ) calculations of 32 OTUs with significant gut and carcass tissue preferences across larval breeding sites.**

| OTUID          | Taxa                                           | Ecological guild                                                        | $r_{pb}$ | p-value |
|----------------|------------------------------------------------|-------------------------------------------------------------------------|----------|---------|
| <b>Gut</b>     |                                                |                                                                         |          |         |
| Otu00079       | <i>Ganoderma</i> sp.                           | Plant pathogen, Saprophyte                                              | 0.217    | 0.0019  |
| Otu00051       | Unclassified Fungus                            | -                                                                       | 0.216    | 0.0049  |
| Otu00040       | Unclassified Trichosphaeriales                 | -                                                                       | 0.214    | 0.0002  |
| Otu00395       | Unclassified Ustilaginales                     | -                                                                       | 0.212    | 0.0001  |
| Otu00056       | <i>Deniquelata barringtoniae</i>               | Saprophyte                                                              | 0.211    | 0.0031  |
| Otu00046       | Unclassified Agaricomycetes                    | -                                                                       | 0.201    | 0.0004  |
| Otu00095       | Unclassified Fungus                            | -                                                                       | 0.193    | 0.0071  |
| Otu00022       | Unclassified Ustilaginaceae                    | -                                                                       | 0.189    | 0.004   |
| Otu00201       | Unclassified Ascomycota                        | -                                                                       | 0.185    | 0.0032  |
| Otu00258       | Unclassified Fungus                            | -                                                                       | 0.179    | 0.0131  |
| Otu00106       | <i>Phaeoacremonium tuscanum</i>                | Plant pathogen                                                          | 0.178    | 0.0164  |
| Otu00136       | <i>Sclerostagonospora</i> sp.                  | Saprophyte                                                              | 0.174    | 0.0203  |
| Otu00111       | <i>Stachybotrys microspora</i>                 | Saprophyte                                                              | 0.163    | 0.0315  |
| Otu00131       | Unclassified Microasceae                       | Animal pathogen, Endophyte, Plant pathogen, Saprophyte                  | 0.162    | 0.0142  |
| Otu00228       | <i>Piliella eucalyptorum</i>                   | Plant pathogen                                                          | 0.161    | 0.0134  |
| Otu00269       | Unclassified Fungus                            | -                                                                       | 0.16     | 0.0317  |
| Otu00380       | <i>Trichoderma asperellum</i>                  | Endophyte, Plant pathogen, Saprophyte                                   | 0.159    | 0.0029  |
| Otu00093       | <i>Coprinellus disseminatus</i>                | Saprophyte                                                              | 0.153    | 0.0024  |
| Otu00075       | <i>Chlorophyllum molybdites</i>                | Saprophyte                                                              | 0.152    | 0.048   |
| Otu00187       | Unclassified Fungus                            | -                                                                       | 0.152    | 0.0075  |
| Otu00396       | Unclassified Fungus                            | -                                                                       | 0.151    | 0.0317  |
| Otu00161       | <i>Phaeobotryon cupressi</i>                   | Plant pathogen                                                          | 0.15     | 0.0127  |
| Otu00129       | <i>Gibberella zeae</i>                         | Plant pathogen                                                          | 0.149    | 0.0272  |
| Otu00230       | <i>Calvatia cyathiformis</i>                   | Saprophyte                                                              | 0.139    | 0.0018  |
| Otu00250       | Unclassified Trichosphaeriales                 | -                                                                       | 0.124    | 0.0048  |
| Otu00118       | <i>Wallemia sebi</i>                           | Saprophyte                                                              | 0.115    | 0.0288  |
| Otu00346       | <i>Scleroderma</i> sp.                         | Ectomycorrhizal                                                         | 0.111    | 0.0029  |
| Otu00146       | <i>Periconia</i> sp.                           | Endophyte, Plant pathogen, Saprophyte                                   | 0.096    | 0.0278  |
| Otu00328       | <i>Inonotus hispidus</i>                       | Saprophyte                                                              | 0.089    | 0.0132  |
| <b>Carcass</b> |                                                |                                                                         |          |         |
| Otu00005       | <i>Alternaria porri</i>                        | Saprophyte, Plant pathogen, Endophyte, Animal pathogen                  | 0.246    | 0.0002  |
| Otu00009       | <i>Clonostachys rosea</i> f. <i>catenulata</i> | Plant pathogen                                                          | 0.223    | 0.0002  |
| Otu00018       | <i>Aspergillus</i> sp.                         | Saprophyte, Endophyte, Animal pathogen                                  | 0.217    | 0.0027  |
| Otu00008       | Unclassified Pleosporales                      | -                                                                       | 0.209    | 0.0058  |
| Otu00035       | Unclassified Agaricomycetes                    | -                                                                       | 0.206    | 0.0013  |
| Otu00003       | Unclassified Davidiellaceae                    | -                                                                       | 0.198    | 0.005   |
| Otu00033       | <i>Acremonium</i> sp.                          | Saprophyte, Plant pathogen, Endophyte, Animal pathogen, Fungal parasite | 0.195    | 0.0006  |
| Otu00246       | <i>Periconia</i> sp.                           | Saprophyte, Plant pathogen, Endophyte                                   | 0.164    | 0.003   |
| Otu00043       | <i>Aureobasidium pullulans</i>                 | Animal Pathogen-Endophyte-Epiphyte-Plant Pathogen-Undefined Saprotroph  | 0.16     | 0.0262  |
