# Supplementary material for: Host-Environment Interplay Shapes Fungal Diversity in Mosquitoes
Source: PubMed Central journal article supplement (PMC8550294; doi:10.1128/msphere.00646-21), 2021-09-29
Supplement: msphere.00646-21-st005.pdf [file msphere.00646-21-st005.pdf]

**Table S5. Indicator value index (IndVal) calculations of 64 mosquito gut Indicator ASVs across the larval breeding sites.**

| ASVID     | Taxa assignment                  | Ecological guild                     | IndVal | A <sub>ind</sub> | B <sub>pa</sub> | p-value |
|-----------|----------------------------------|--------------------------------------|--------|------------------|-----------------|---------|
| Asv90080  | <i>Penicillium</i> sp.           | Saprophyte                           | 0.548  | 0.798            | 0.376           | 0.0002  |
| Asv92426  | Unclassified Fungus              | -                                    | 0.514  | 0.865            | 0.306           | 0.0002  |
| Asv90124  | <i>Saccharomyces eubayanus</i>   | Saprophyte                           | 0.445  | 0.800            | 0.247           | 0.0002  |
| Asv113293 | <i>Aspergillus</i> sp.           | Saprophyte                           | 0.407  | 0.938            | 0.176           | 0.0007  |
| Asv106764 | <i>Cordyceps bassiana</i>        | Plant pathogen, Symbiont             | 0.400  | 0.850            | 0.188           | 0.0068  |
| Asv91545  | <i>Zopfiella marina</i>          | Saprophyte                           | 0.391  | 1.00             | 0.153           | 0.0002  |
| Asv90705  | Unclassified Davidiellaceae      | -                                    | 0.389  | 0.643            | 0.235           | 0.0316  |
| Asv109290 | <i>Malassezia</i> sp.            | Saprophyte, Plant pathogen           | 0.384  | 0.738            | 0.200           | 0.0295  |
| Asv99680  | Unclassified Sebacinales         | -                                    | 0.381  | 0.883            | 0.165           | 0.0008  |
| Asv90082  | <i>Saccharomyces eubayanus</i>   | Saprophyte                           | 0.377  | 0.864            | 0.165           | 0.0085  |
| Asv121166 | <i>Thanatephorus cucumeris</i>   | Plant pathogen                       | 0.377  | 0.864            | 0.165           | 0.003   |
| Asv98754  | <i>Aspergillus piperis</i>       | Saprophyte                           | 0.377  | 0.929            | 0.153           | 0.0018  |
| Asv90683  | Unclassified Malasseziales       | -                                    | 0.376  | 0.667            | 0.212           | 0.0308  |
| Asv090134 | <i>Malassezia restricta</i>      | Saprophyte, Plant pathogen           | 0.376  | 1.00             | 0.141           | 0.0004  |
| Asv90938  | <i>Paraconiothyrium</i> sp.      | Saprophyte                           | 0.376  | 1.00             | 0.141           | 0.0002  |
| Asv118130 | <i>Malassezia restricta</i>      | Saprophyte, Plant pathogen           | 0.369  | 0.771            | 0.176           | 0.0371  |
| Asv090182 | <i>Saccharomyces</i> sp.         | Saprophyte                           | 0.368  | 0.676            | 0.200           | 0.0351  |
| Asv100048 | Unclassified Montagnulaceae      | Saprophyte, Plant pathogen           | 0.360  | 0.919            | 0.141           | 0.009   |
| Asv99655  | Unclassified Montagnulaceae      | Saprophyte, Plant pathogen           | 0.360  | 1.00             | 0.129           | 0.0011  |
| Asv128755 | <i>Malassezia restricta</i>      | Saprophyte, Plant pathogen           | 0.360  | 1.00             | 0.129           | 0.0008  |
| Asv94461  | Unclassified Ustilaginaceae      | Plant pathogen                       | 0.354  | 0.968            | 0.129           | 0.0022  |
| Asv106556 | <i>Cordyceps bassiana</i>        | Plant pathogen, Symbiont             | 0.344  | 0.773            | 0.153           | 0.0303  |
| Asv97619  | <i>Coprinellus xanthothrix</i>   | Saprophyte                           | 0.343  | 1.00             | 0.117           | 0.0023  |
| Asv97302  | Unclassified Montagnulaceae      | Saprophyte, Plant pathogen           | 0.337  | 0.876            | 0.129           | 0.0111  |
| Asv90207  | Unclassified Ascomycota          | -                                    | 0.33   | 0.769            | 0.141           | 0.0365  |
| Asv90198  | <i>Malassezia globosa</i>        | Saprophyte, Plant pathogen           | 0.325  | 1.00             | 0.106           | 0.003   |
| Asv96534  | <i>Cytospora</i> sp.             | Saprophyte, Plant pathogen, Symbiont | 0.325  | 1.00             | 0.106           | 0.0024  |
| Asv121705 | <i>Cordyceps bassiana</i>        | Plant pathogen, Symbiont             | 0.325  | 1.00             | 0.106           | 0.0026  |
| Asv97308  | Unclassified Montagnulaceae      | -                                    | 0.317  | 0.854            | 0.118           | 0.022   |
| Asv106555 | Unclassified Montagnulaceae      | Saprophyte, Plant pathogen           | 0.322  | 0.881            | 0.118           | 0.0255  |
| Asv90169  | <i>Aspergillus brasiliensis</i>  | Saprophyte                           | 0.321  | 0.878            | 0.118           | 0.0079  |
| Asv90086  | <i>Saccharomyces eubayanus</i>   | Saprophyte                           | 0.317  | 0.856            | 0.118           | 0.0222  |
| Asv97315  | <i>Deniquelata barringtoniae</i> |                                      | 0.317  | 0.854            | 0.118           | 0.022   |
| Asv106925 | Unclassified Eurotiomycetes      | -                                    | 0.309  | 0.901            | 0.106           | 0.0169  |
| Asv106391 | Unclassified Montagnulaceae      | Saprophyte, Plant pathogen           | 0.307  | 1.00             | 0.094           | 0.0072  |
| Asv128734 | <i>Malassezia restricta</i>      | Saprophyte, Plant pathogen           | 0.307  | 1.00             | 0.094           | 0.0053  |
| Asv90589  | Unclassified Trichosphaeriales   | -                                    | 0.307  | 1.00             | 0.094           | 0.007   |
| Asv97357  | <i>Gibberella intricans</i>      | Plant pathogen                       | 0.307  | 1.00             | 0.094           | 0.0062  |
| Asv91643  | <i>Trichoderma</i> sp.           | Saprophyte                           | 0.307  | 1.00             | 0.094           | 0.0069  |
| Asv106380 | Unclassified Montagnulaceae      | Saprophyte, Plant pathogen           | 0.307  | 1.00             | 0.094           | 0.0072  |
| Asv106383 | Unclassified Ustilaginaceae      | Plant pathogen                       | 0.305  | 0.991            | 0.094           | 0.0072  |
| Asv113385 | Unclassified Fungus              | -                                    | 0.303  | 0.869            | 0.106           | 0.027   |
| Asv121159 | <i>Adisciso</i> sp.              | Plant pathogen                       | 0.302  | 0.859            | 0.106           | 0.0479  |
| Asv102174 | Unclassified Ascomycota          | -                                    | 0.288  | 0.88             | 0.094           | 0.0454  |

|           |                                |                                      |       |       |       |        |
|-----------|--------------------------------|--------------------------------------|-------|-------|-------|--------|
| Asv97316  | Unclassified Coniochaetaceae   | Saprophyte, Plant pathogen, Symbiont | 0.287 | 1.00  | 0.082 | 0.0129 |
| Asv90510  | <i>Saccharomyces</i> sp.       | Saprophyte                           | 0.287 | 1.00  | 0.082 | 0.0159 |
| Asv132887 | <i>Saccharomyces eubayanus</i> | Saprophyte                           | 0.287 | 1.00  | 0.082 | 0.0156 |
| Asv106423 | Unclassified Davidiellaceae    | -                                    | 0.286 | 0.87  | 0.084 | 0.0308 |
| Asv090063 | <i>Coprinopsis</i> sp.         | Saprophyte                           | 0.272 | 0.899 | 0.082 | 0.0279 |
| Asv108733 | Unclassified Ustilaginaceae    | Plant pathogen                       | 0.27  | 0.884 | 0.082 | 0.0499 |
| Asv90076  | <i>Aspergillus</i> sp.         | Saprophyte                           | 0.266 | 0.858 | 0.082 | 0.0487 |
| Asv97321  | Unclassified Tremellales       | Saprophyte, Fungal parasite          | 0.266 | 1.00  | 0.070 | 0.0306 |
| Asv106384 | Unclassified Ustilaginaceae    | Plant pathogen                       | 0.266 | 1.00  | 0.070 | 0.0293 |
| Asv90165  | <i>Aspergillus</i> sp.         | Saprophyte                           | 0.266 | 1.00  | 0.070 | 0.0304 |
| Asv106399 | <i>Malassezia</i> sp.          | Saprophyte, Plant pathogen           | 0.266 | 1.00  | 0.070 | 0.0302 |
| Asv101533 | Unclassified Ascomycota        | -                                    | 0.266 | 1.00  | 0.070 | 0.0267 |
| Asv106427 | <i>Malassezia</i> sp.          | Saprophyte, Plant pathogen           | 0.266 | 1.00  | 0.070 | 0.0302 |
| Asv90652  | Unclassified Sordariomycetes   | -                                    | 0.266 | 1.00  | 0.070 | 0.0268 |
| Asv136051 | <i>Penicillium</i> sp.         | Saprophyte                           | 0.266 | 1.00  | 0.070 | 0.0306 |
| Asv102186 | <i>Malassezia restricta</i>    | Saprophyte, Plant pathogen           | 0.266 | 1.00  | 0.070 | 0.0272 |
| Asv106565 | Unclassified Davidiellaceae    | -                                    | 0.266 | 1.00  | 0.070 | 0.0281 |
| Asv106450 | Unclassified Montagnulaceae    | Saprophyte, Plant pathogen           | 0.266 | 1.00  | 0.070 | 0.0302 |
| Asv97440  | Unclassified Pleosporales      | -                                    | 0.266 | 1.00  | 0.070 | 0.0275 |
| Asv101559 | Unclassified Trichosphaeriales | -                                    | 0.266 | 1.00  | 0.070 | 0.0297 |
