# Supplementary material for: Host-Environment Interplay Shapes Fungal Diversity in Mosquitoes
Source: PubMed Central journal article supplement (PMC8550294; doi:10.1128/msphere.00646-21), 2021-09-29
Supplement: msphere.00646-21-st006.pdf [file msphere.00646-21-st006.pdf]

**Table S6. Point-biserial correlation ( $r_{pb}$ ) calculations of 48 ASVs with significant gut preference and seven ASVs with significant carcass preference across larval breeding sites.**

| ASVID      | Taxa                            | Ecological guild                                                        | $r_{pb}$ | p-value |
|------------|---------------------------------|-------------------------------------------------------------------------|----------|---------|
| <b>Gut</b> |                                 |                                                                         |          |         |
| Asv90080   | <i>Penicillium sp.</i>          | Saprophyte                                                              | 0.279    | 0.0004  |
| Asv106383  | Unclassified Ustilaginaceae     | Plant pathogen                                                          | 0.217    | 0.0043  |
| Asv106391  | Unclassified Montagnulaceae     | Saprophyte, Plant pathogen, Fungal parasite                             | 0.21     | 0.0043  |
| Asv128755  | <i>Malassezia restricta</i>     | Saprophyte, Animal pathogen                                             | 0.209    | 0.001   |
| Asv97302   | Unclassified Montagnulaceae     | Saprophyte, Plant pathogen                                              | 0.197    | 0.007   |
| Asv90124   | <i>Saccharomyces eubayanus</i>  | Saprophyte                                                              | 0.197    | 0.0081  |
| Asv113293  | <i>Aspergillus sp.</i>          | Saprophyte                                                              | 0.197    | 0.0029  |
| Asv99680   | Unclassified Sebaciales         | -                                                                       | 0.192    | 0.0065  |
| Asv97619   | <i>Coprinellus xanthothrix</i>  | Saprophyte                                                              | 0.192    | 0.0011  |
| Asv90198   | <i>Malassezia globosa</i>       | Saprophyte, Animal pathogen                                             | 0.189    | 0.0023  |
| Asv090134  | <i>Malassezia restricta</i>     | Saprophyte, Animal pathogen                                             | 0.189    | 0.0023  |
| Asv121166  | <i>Thanatephorus cucumeris</i>  | Plant pathogen                                                          | 0.189    | 0.0111  |
| Asv94461   | Unclassified Ustilaginaceae     | Plant pathogen                                                          | 0.188    | 0.033   |
| Asv100048  | Unclassified Montagnulaceae     | Saprophyte, Plant pathogen                                              | 0.186    | 0.004   |
| Asv106380  | Unclassified Montagnulaceae     | Saprophyte, Plant pathogen                                              | 0.186    | 0.0043  |
| Asv97357   | <i>Gibberella intricans</i>     | Plant pathogen                                                          | 0.184    | 0.0051  |
| Asv90938   | <i>Paraconiothyrium sp.</i>     | Saprophyte                                                              | 0.182    | 0.0007  |
| Asv97440   | Unclassified Pleosporales       | -                                                                       | 0.18     | 0.0315  |
| Asv113385  | Unclassified Fungus             | -                                                                       | 0.177    | 0.014   |
| Asv106399  | <i>Malassezia sp.</i>           | Saprophyte, Plant pathogen                                              | 0.176    | 0.0286  |
| Asv121159  | <i>Adiscio sp.</i>              | Plant pathogen                                                          | 0.175    | 0.0179  |
| Asv97308   | Unclassified Montagnulaceae     | -                                                                       | 0.175    | 0.0132  |
| Asv91643   | <i>Trichoderma sp.</i>          | Saprophyte                                                              | 0.174    | 0.0071  |
| Asv106925  | Unclassified Eurotiomycetes     | -                                                                       | 0.172    | 0.0154  |
| Asv90063   | <i>Coprinopsis sp.</i>          | Saprophyte                                                              | 0.17     | 0.0295  |
| Asv106565  | Unclassified Davidiellaceae     | -                                                                       | 0.169    | 0.0268  |
| Asv106450  | Unclassified Montagnulaceae     | Saprophyte, Plant pathogen, Fungal parasite                             | 0.169    | 0.0286  |
| Asv90589   | Unclassified Trichosphaeriales  | -                                                                       | 0.167    | 0.007   |
| Asv97321   | Unclassified Tremellales        | Saprophyte, Fungal parasite                                             | 0.163    | 0.0275  |
| Asv96534   | <i>Cytospora sp.</i>            | Saprophyte, Plant pathogen, Endophyte                                   | 0.163    | 0.0036  |
| Asv90165   | <i>Aspergillus sp.</i>          | Saprophyte                                                              | 0.162    | 0.0277  |
| Asv99655   | Unclassified Montagnulaceae     | Saprophyte, Plant pathogen, Fungal parasite                             | 0.161    | 0.0006  |
| Asv90169   | <i>Aspergillus brasiliensis</i> | Saprophyte                                                              | 0.16     | 0.0283  |
| Asv106427  | <i>Malassezia sp.</i>           | Saprophyte, Plant pathogen                                              | 0.158    | 0.0286  |
| Asv106555  | Unclassified Montagnulaceae     | Saprophyte, Plant pathogen, Fungal parasite                             | 0.157    | 0.0234  |
| Asv128734  | <i>Malassezia restricta</i>     | Saprophyte, Animal pathogen                                             | 0.156    | 0.0073  |
| Asv106384  | <i>Paraconiothyrium sp.</i>     | Saprophyte                                                              | 0.156    | 0.0257  |
| Asv136051  | <i>Penicillium sp.</i>          | Saprophyte                                                              | 0.155    | 0.0298  |
| Asv97316   | Unclassified Coniochaetaceae    | Saprophyte, Plant pathogen, Endophyte, Animal Pathogen, Lichen Parasite | 0.151    | 0.0118  |
| Asv132887  | <i>Saccharomyces eubayanus</i>  | Saprophyte                                                              | 0.145    | 0.0151  |

|                |                                |                                                                            |       |        |
|----------------|--------------------------------|----------------------------------------------------------------------------|-------|--------|
| Asv101533      | Unclassified Ascomycota        | -                                                                          | 0.143 | 0.0279 |
| Asv98754       | <i>Aspergillus piperis</i>     | Saprophyte                                                                 | 0.137 | 0.0497 |
| Asv102186      | <i>Malassezia restricta</i>    | Saprophyte, Animal pathogen                                                | 0.134 | 0.0322 |
| Asv121705      | <i>Cordyceps bassiana</i>      | Endophyte, Animal Pathogen, Fungal Parasite                                | 0.127 | 0.0017 |
| Asv101559      | Unclassified Trichosphaeriales | -                                                                          | 0.125 | 0.0274 |
| Asv91545       | <i>Zopfiella marina</i>        | Saprophyte                                                                 | 0.12  | 0.0001 |
| Asv90652       | Unclassified Sordariomycetes   | -                                                                          | 0.117 | 0.0301 |
| Asv90510       | <i>Saccharomyces</i> sp.       | Saprophyte                                                                 | 0.096 | 0.0148 |
| <b>Carcass</b> |                                |                                                                            |       |        |
| Asv91544       | Unclassified Eurotiomycetes    | -                                                                          | 0.182 | 0.0109 |
| Asv90101       | Unclassified Davidiellaceae    | -                                                                          | 0.170 | 0.0124 |
| Asv92336       | Unclassified Dothidiomycetes   | -                                                                          | 0.153 | 0.0305 |
| Asv97303       | Unclassified Agaricomycetes    | -                                                                          | 0.149 | 0.0204 |
| Asv90954       | <i>Cordyceps bassiana</i>      | Endophyte, Animal Pathogen, Fungal Parasite                                | 0.145 | 0.0298 |
| Asv90362       | Unclassified Agaricomycetes    | -                                                                          | 0.143 | 0.0304 |
| Asv92846       | <i>Cladosporium velox</i>      | Saprophyte, Plant Pathogen, Endophyte,<br>Animal Pathogen, Lichen Parasite | 0.123 | 0.0104 |
